# Supplementary material for: Space use and simultaneous movement analyses of lions and spotted hyenas
Source: Research Square preprint supplement (doi:10.21203/rs.3.rs-1605101/v1), 2022-05-03
Supplement: Supplementary file 2 [file 442a35fd63de5e412719f2ce.pdf]

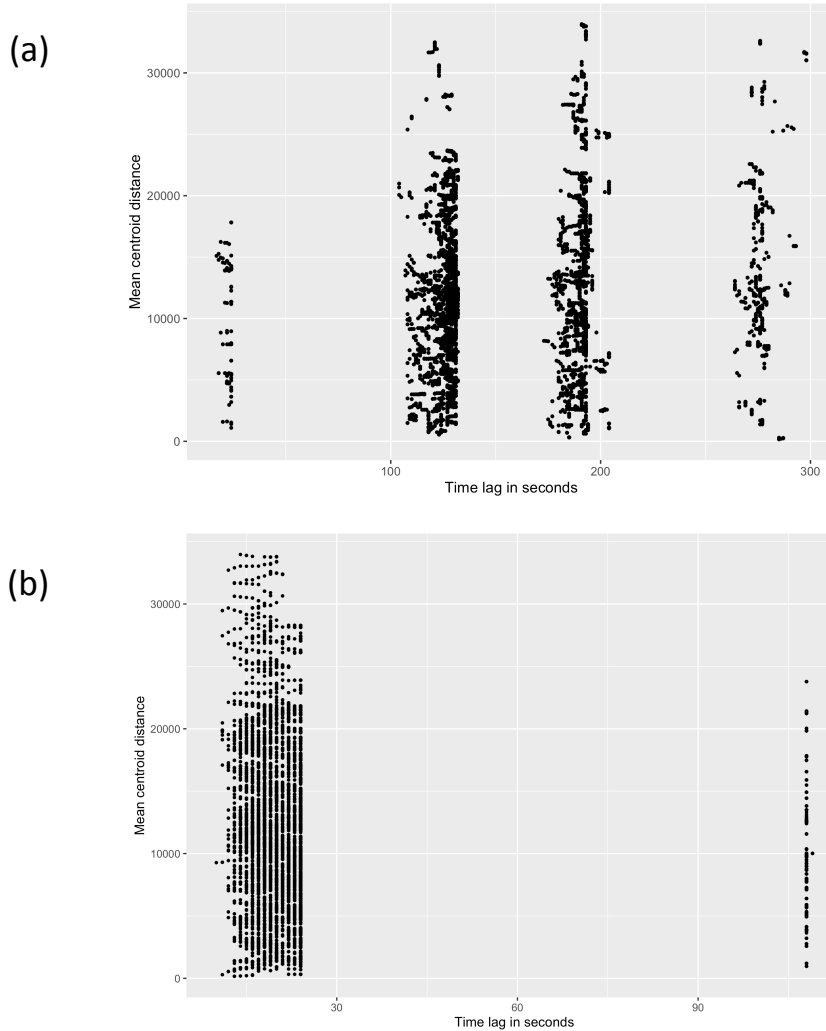

**Supplementary Appendix 1.** Mean centroid distances from temporally overlapping hulls. Mean centroid distances of temporally overlapping hulls were computed from hulls whose parent points were sampled using a maximum time interval of 2.5 minutes, and are of a lion (a) and spotted hyena (b) dyad from Etosha, Namibia. The mean centroid distance from temporally overlapping hulls were used to test for equal means between time-matched and randomly paired centroid distances, shown for the home range and core area overlap in Figure 3e-f.
