# Supplementary material for: Space use and simultaneous movement analyses of lions and spotted hyenas
Source: Research Square preprint supplement (doi:10.21203/rs.3.rs-1605101/v1), 2022-05-03
Supplement: Supplementary file 3 [file 57e0977e7e7bcb72476cabec.pdf]

# Etosha: Wet season spatially overlapping hulls

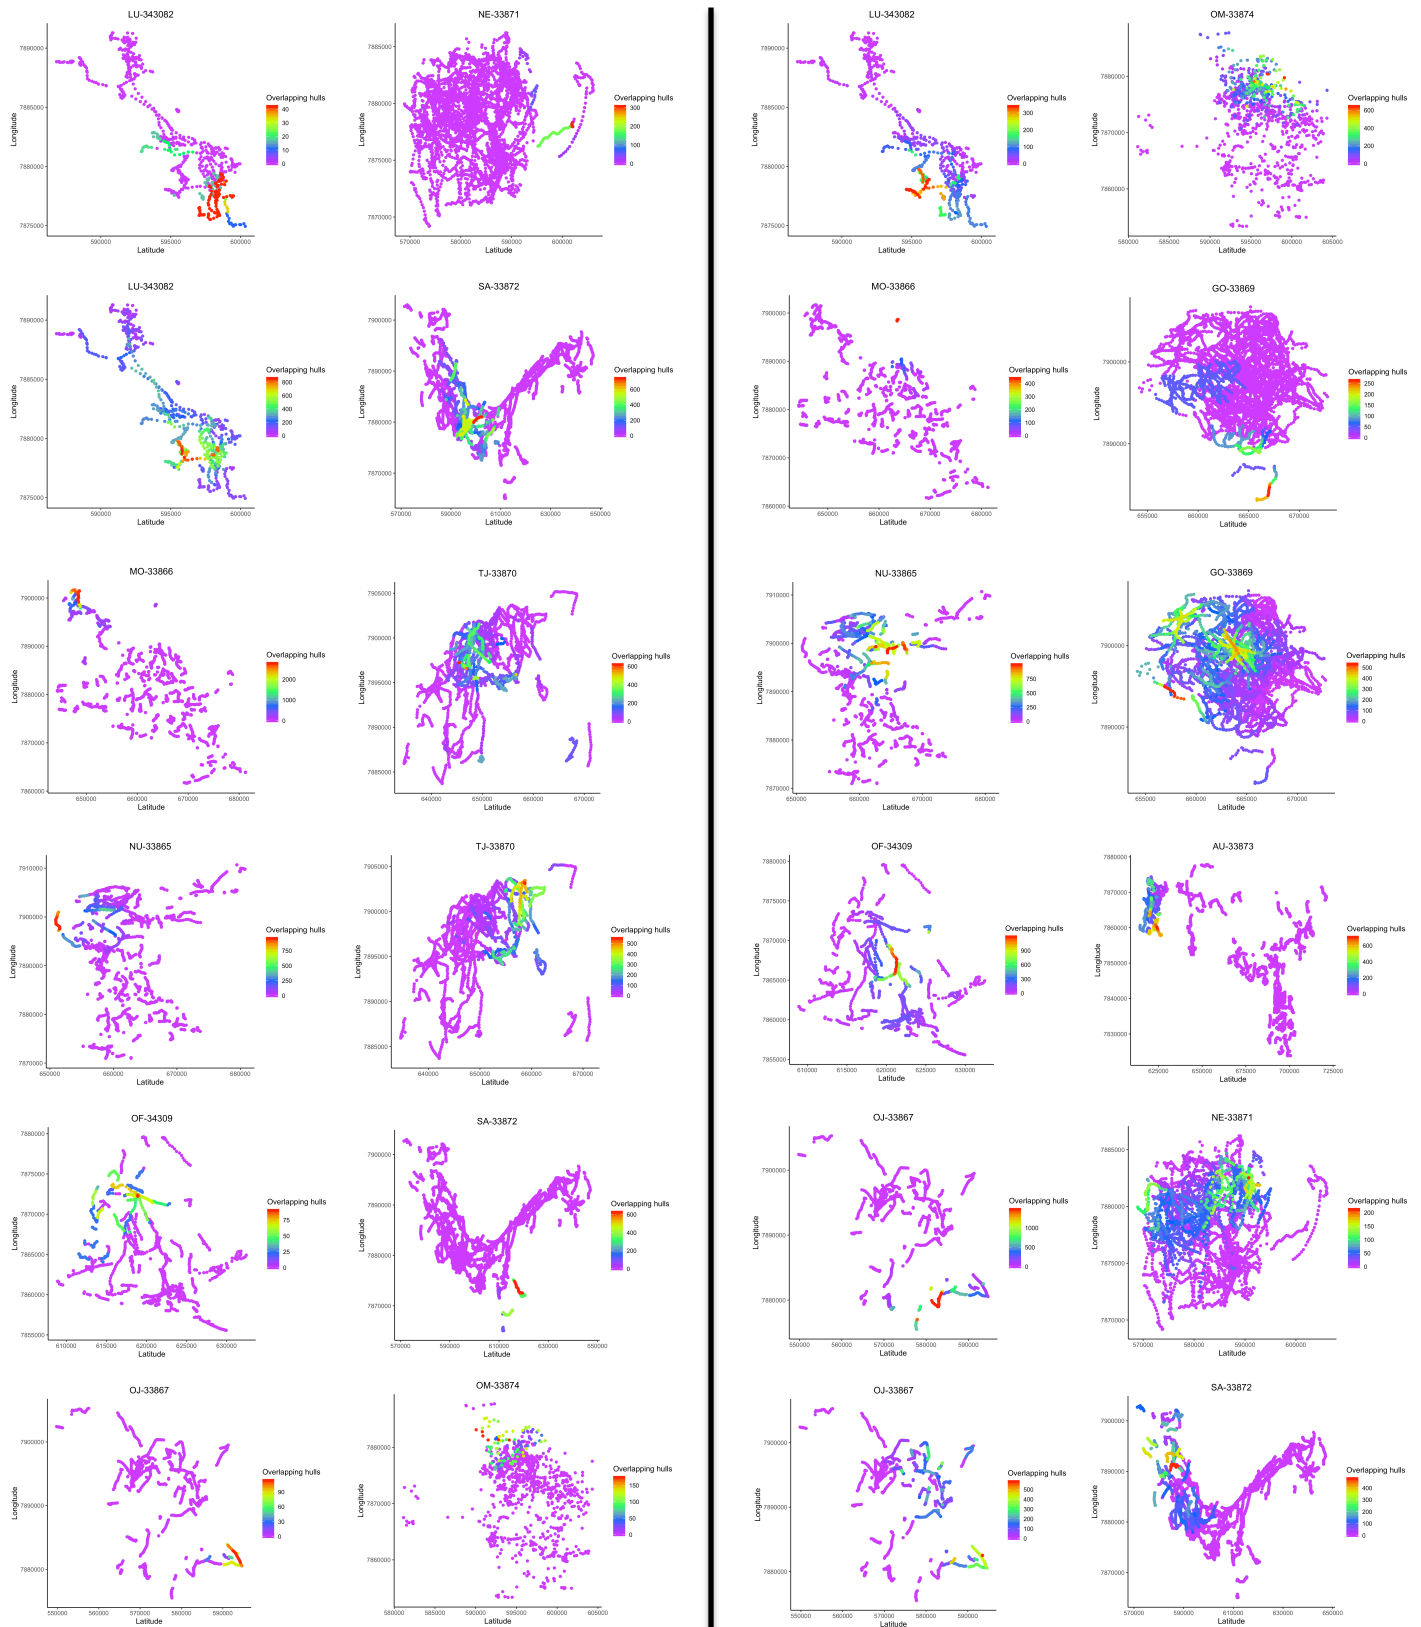

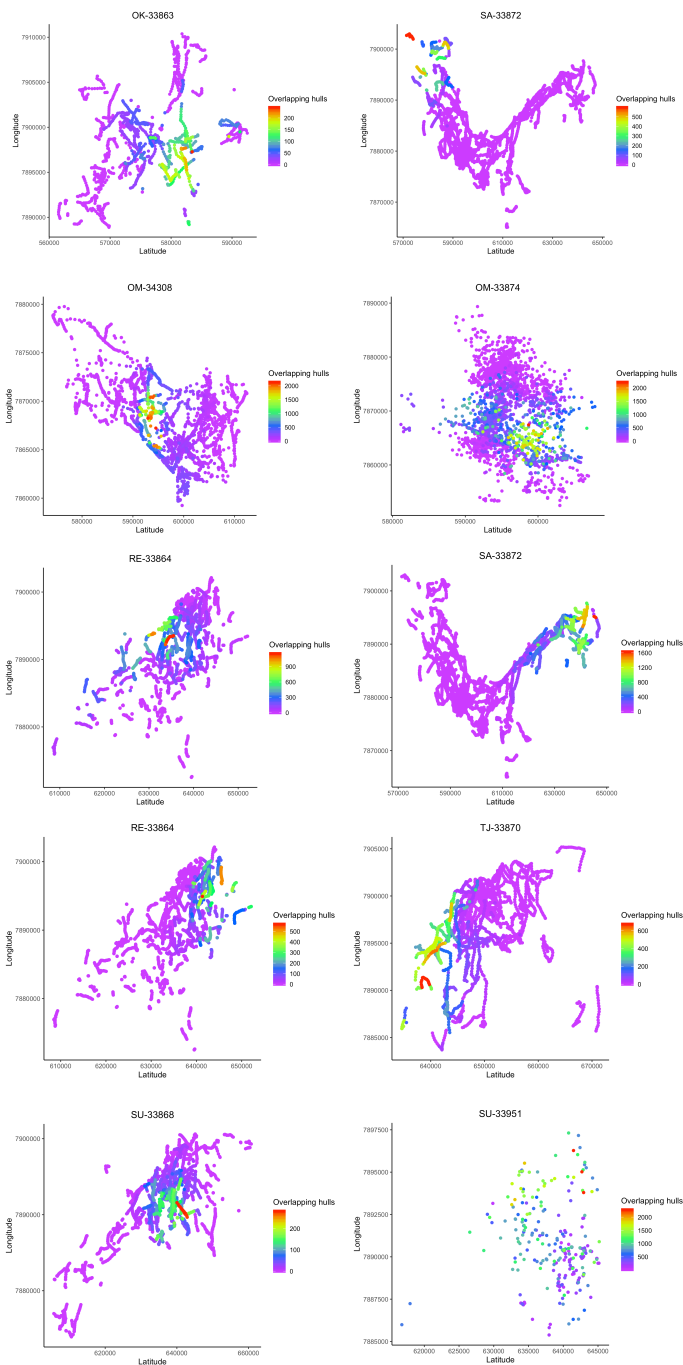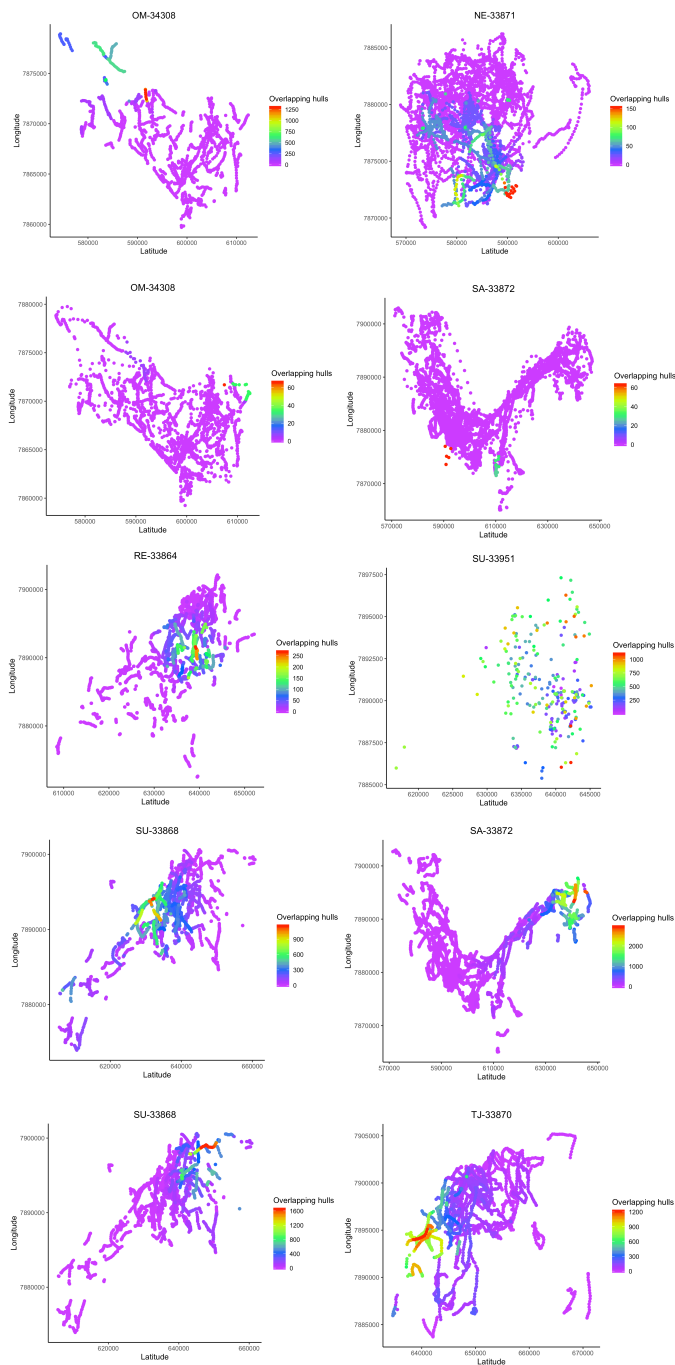

Etosha: Dry season spatially overlapping hulls

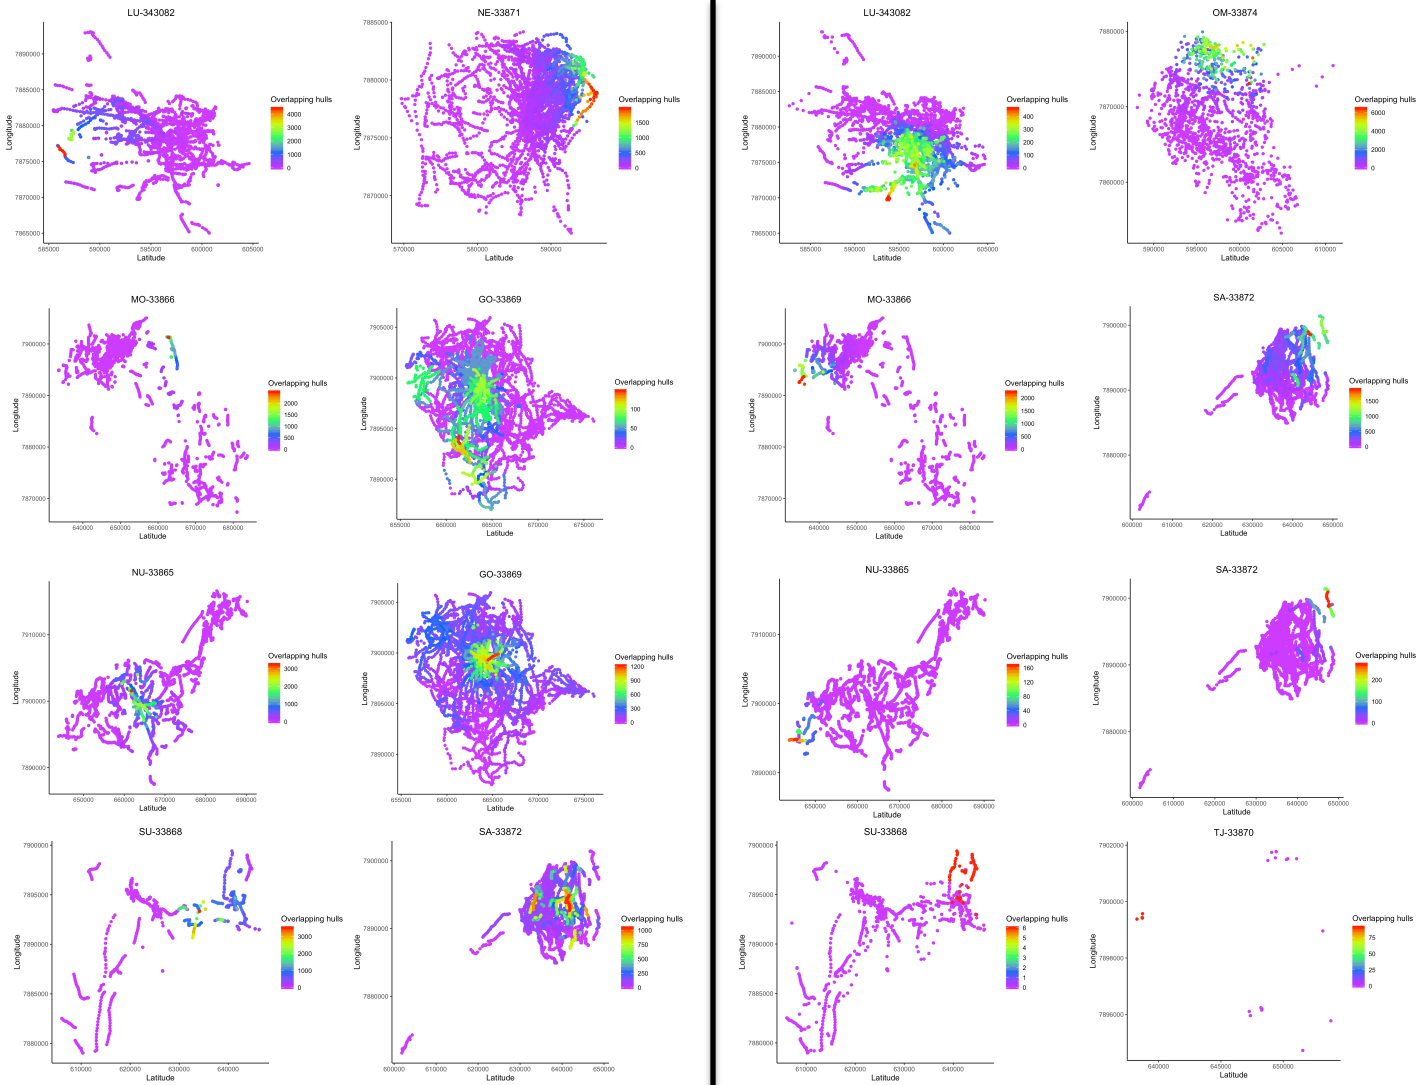

Chobe: Wet season spatially overlapping hulls

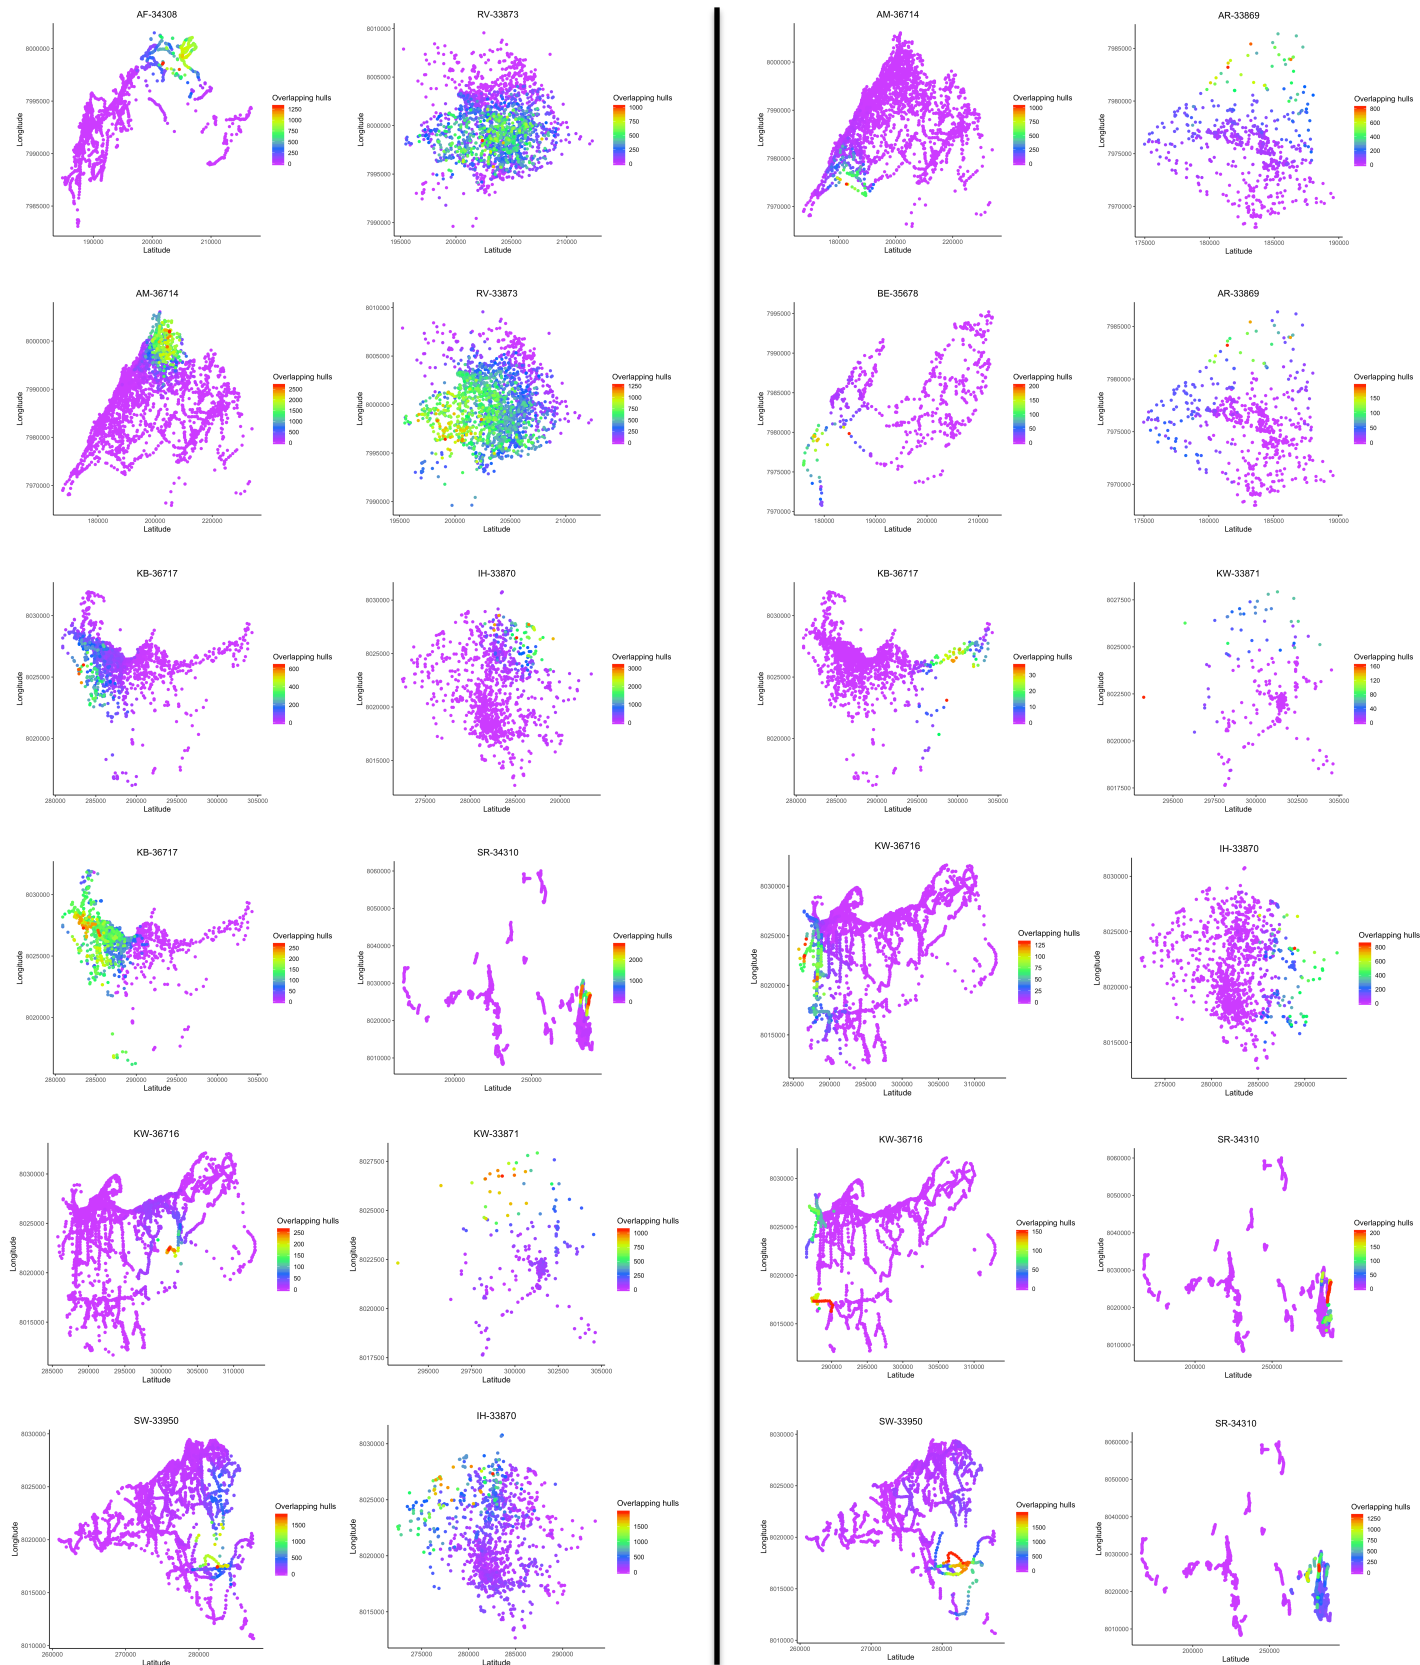



## Chobe: Dry season spatially overlapping hulls

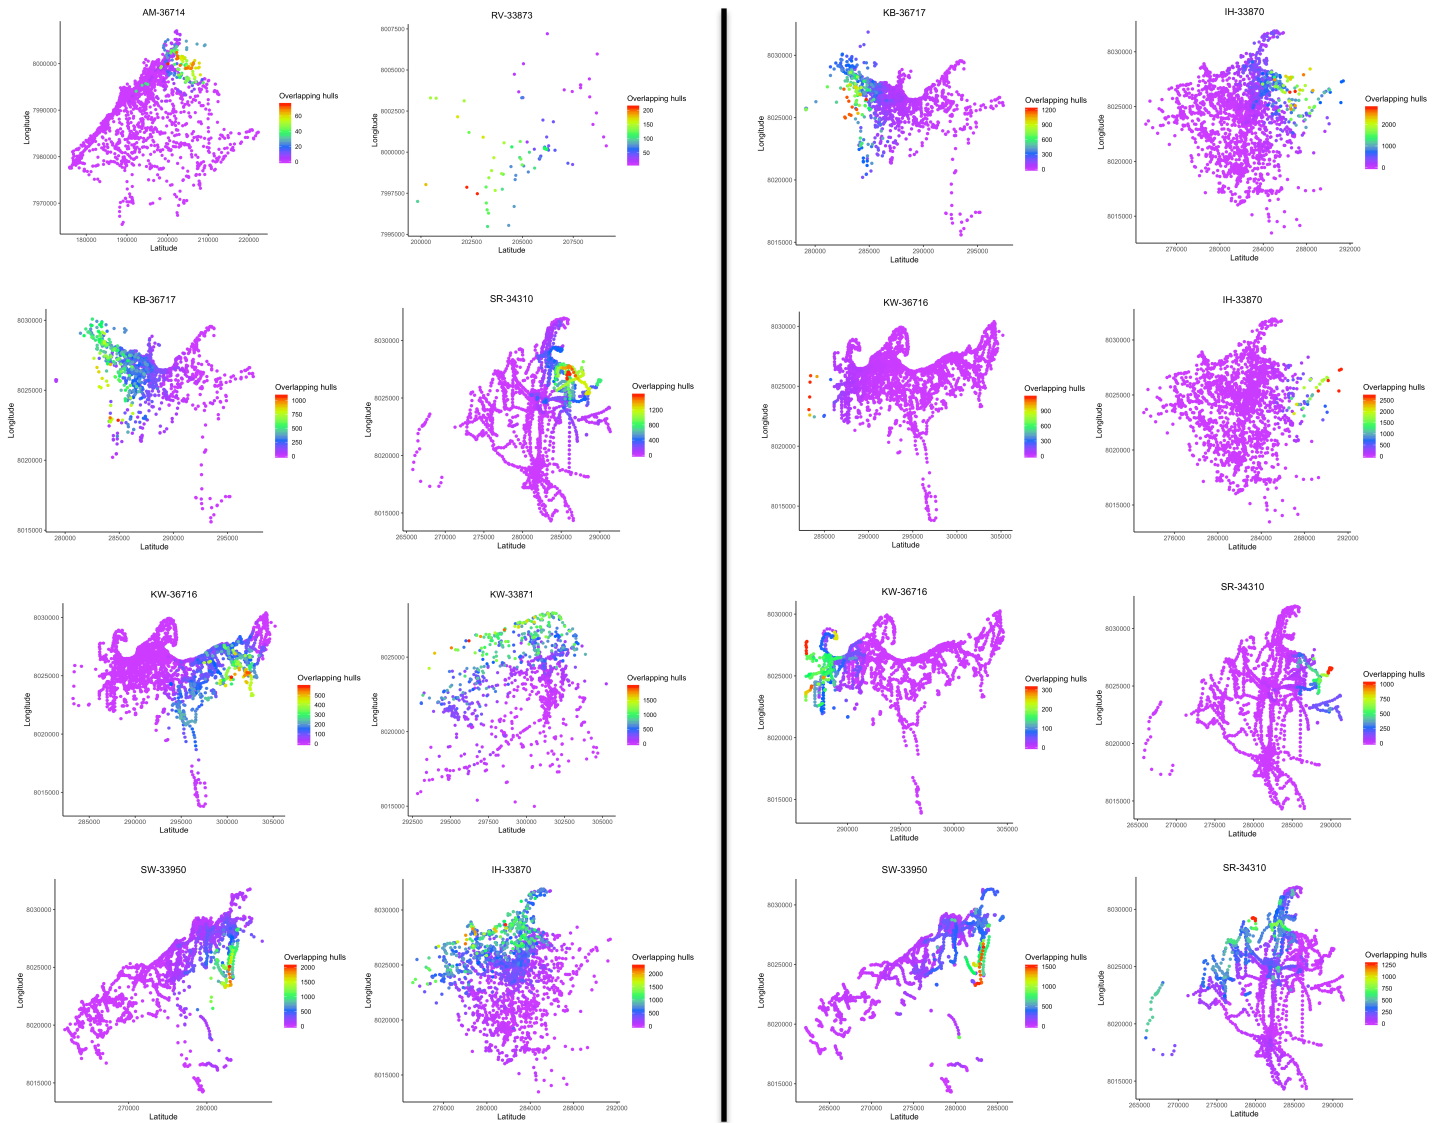

**Supplementary Appendix 2.** Frequency of spatially overlapping hulls for individuals of a dyad. Each row represents two dyads, and the center line separates each dyad. Overlapping hulls of the lion from the dyad are represented by left panels and spotted hyenas are represented by right panels. Red colours indicate the greatest number of overlapping hulls, and purple the least.
