# Supplementary material for: Space use and simultaneous movement analyses of lions and spotted hyenas
Source: Research Square preprint supplement (doi:10.21203/rs.3.rs-1605101/v1), 2022-05-03
Supplement: Supplementary file 4 [file d1b122fb0694f2672851283a.pdf]

# Etosha: Wet season temporally overlapping hulls

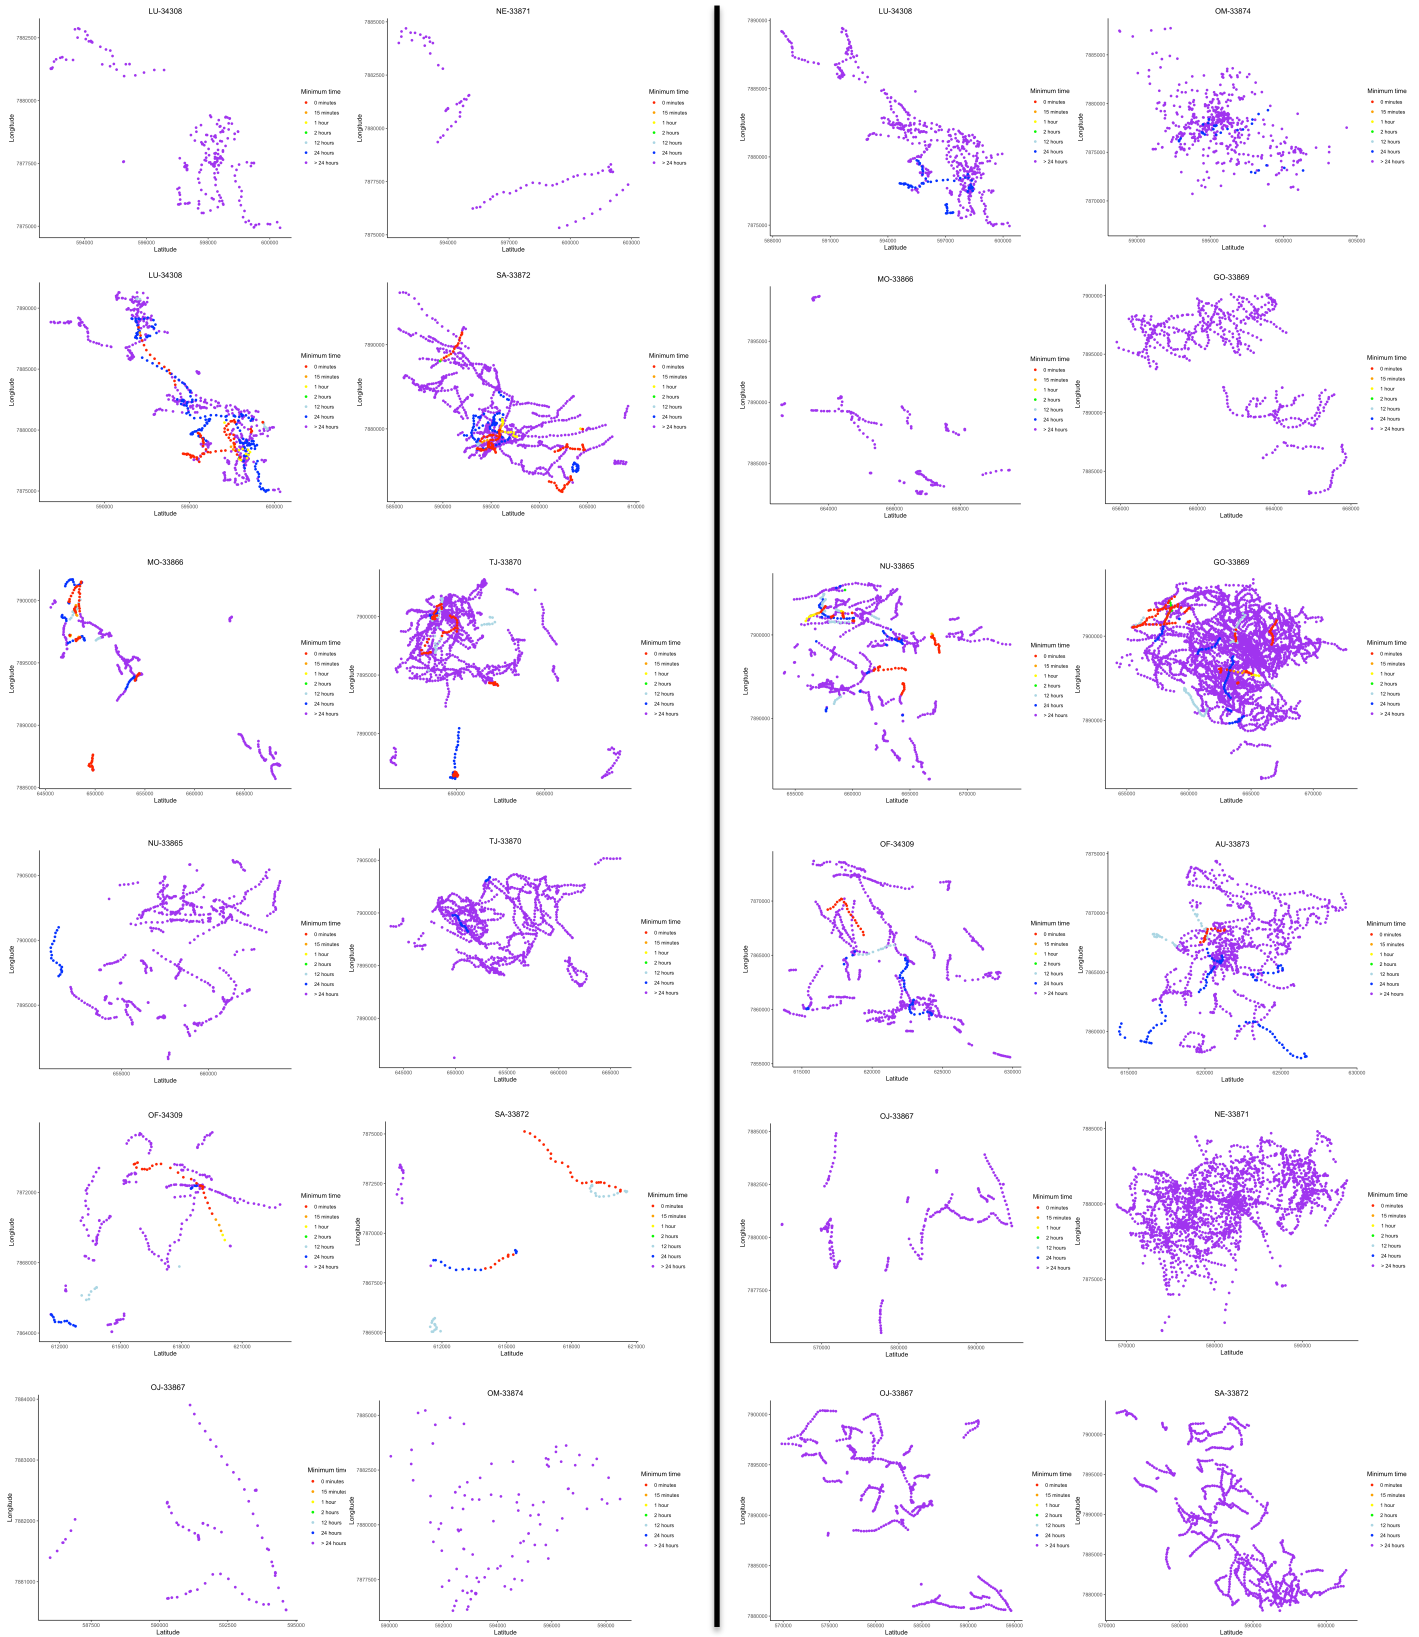

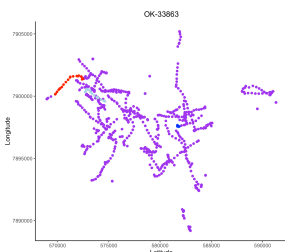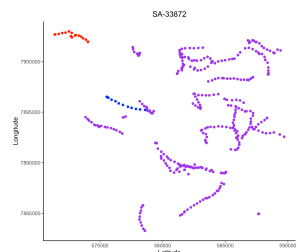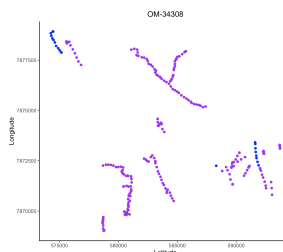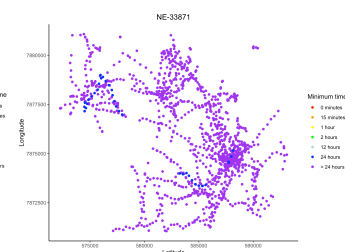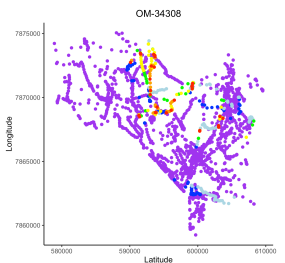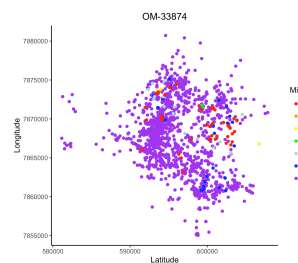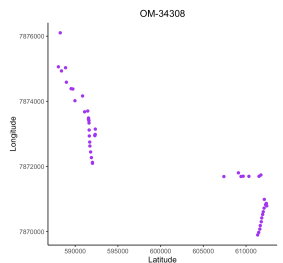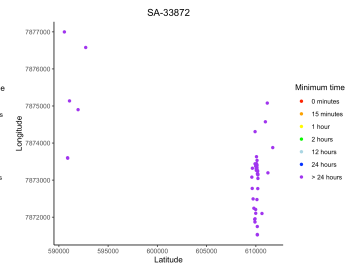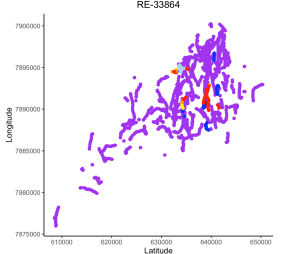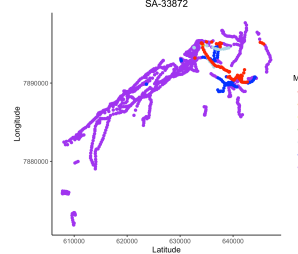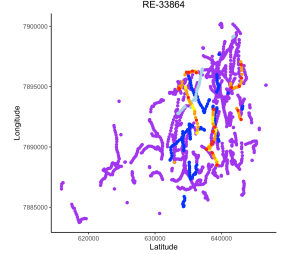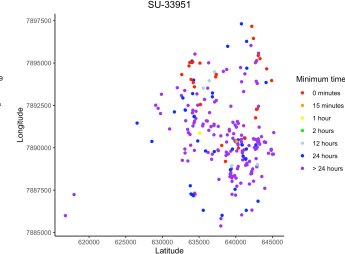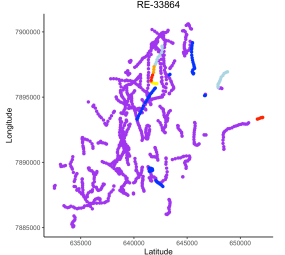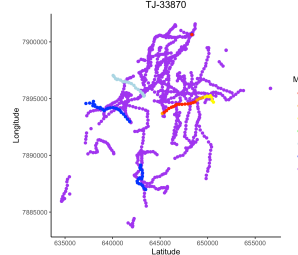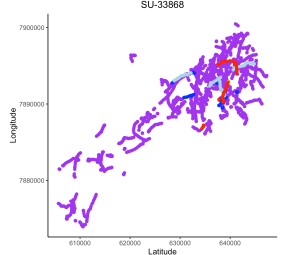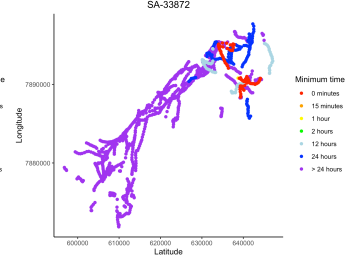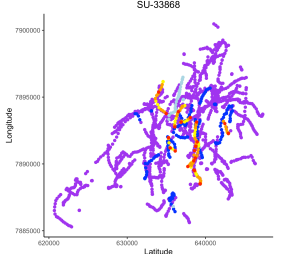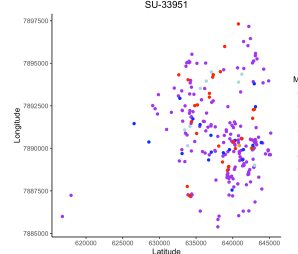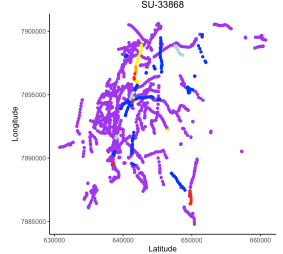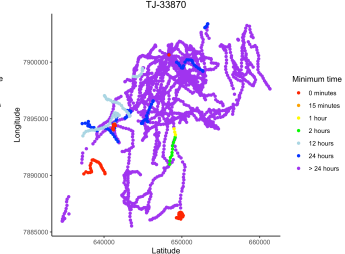

Etosha: Dry season temporally overlapping hulls

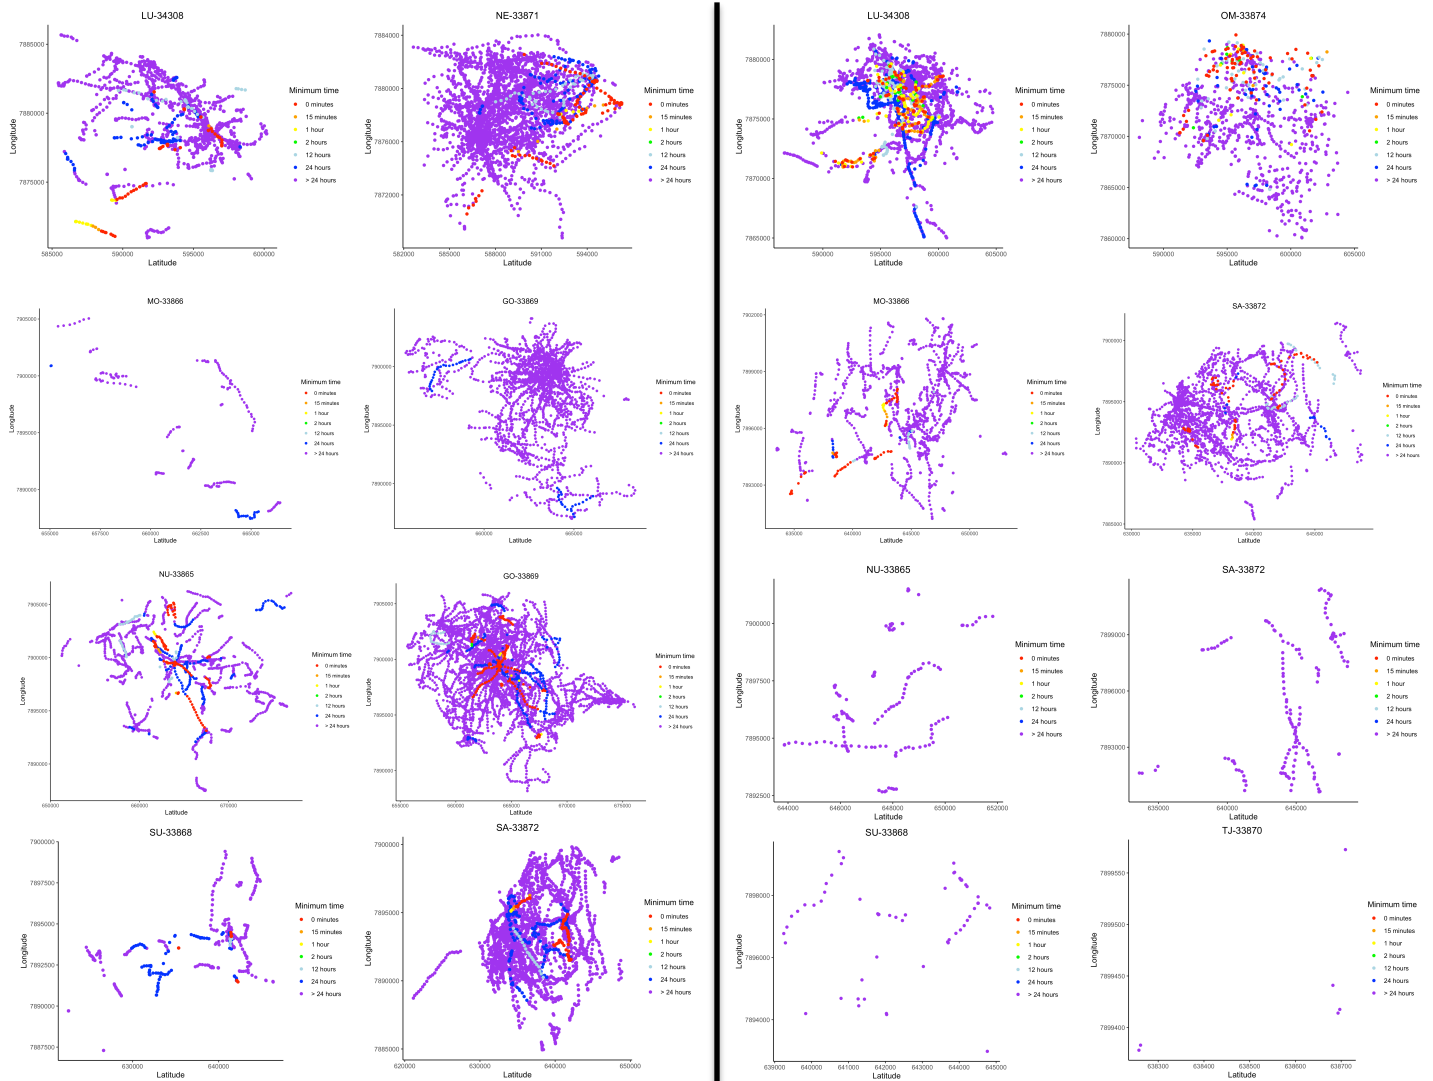

# Chobe: Wet season temporally overlapping hulls

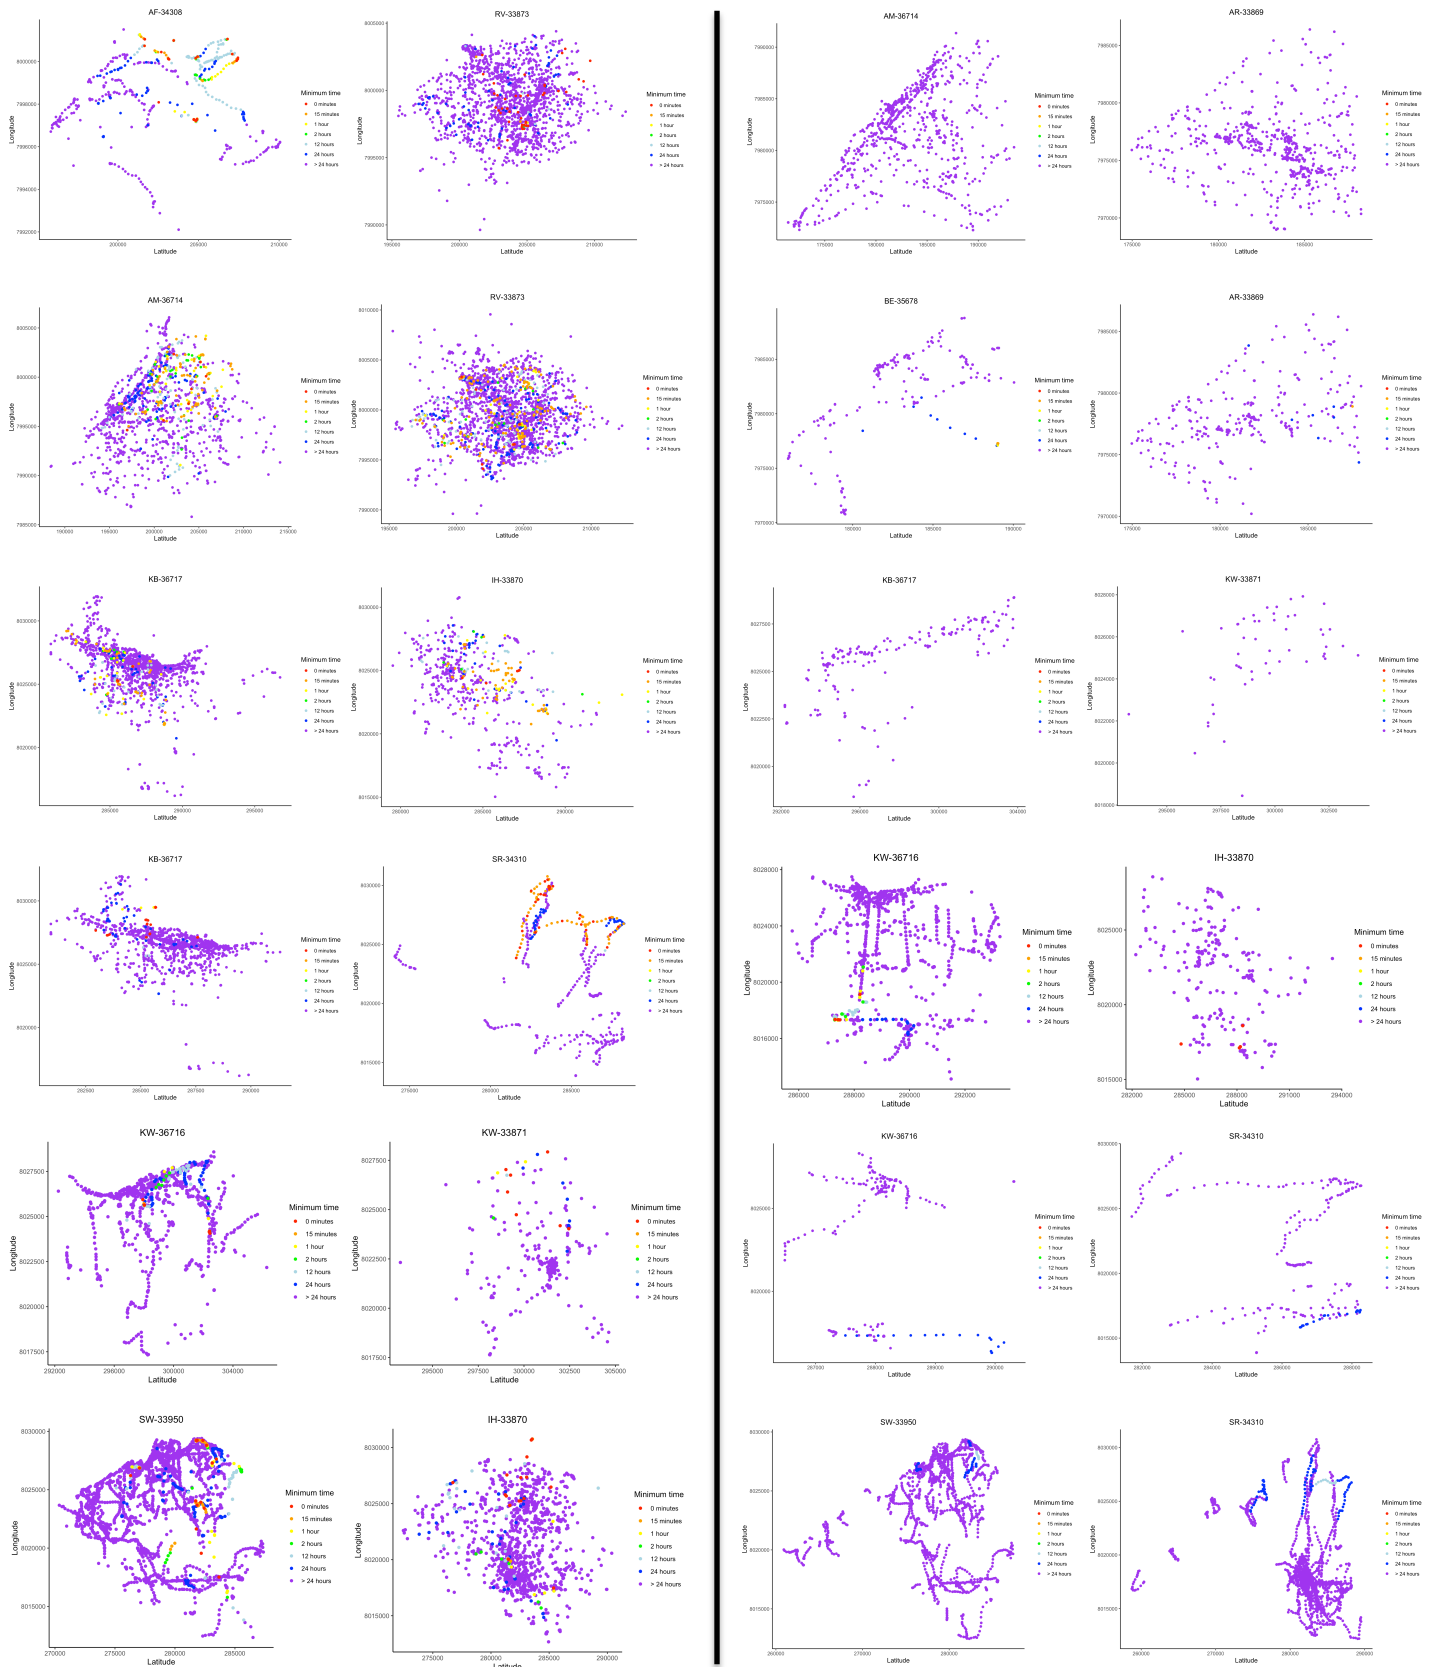



## Chobe: Dry season temporally overlapping hulls

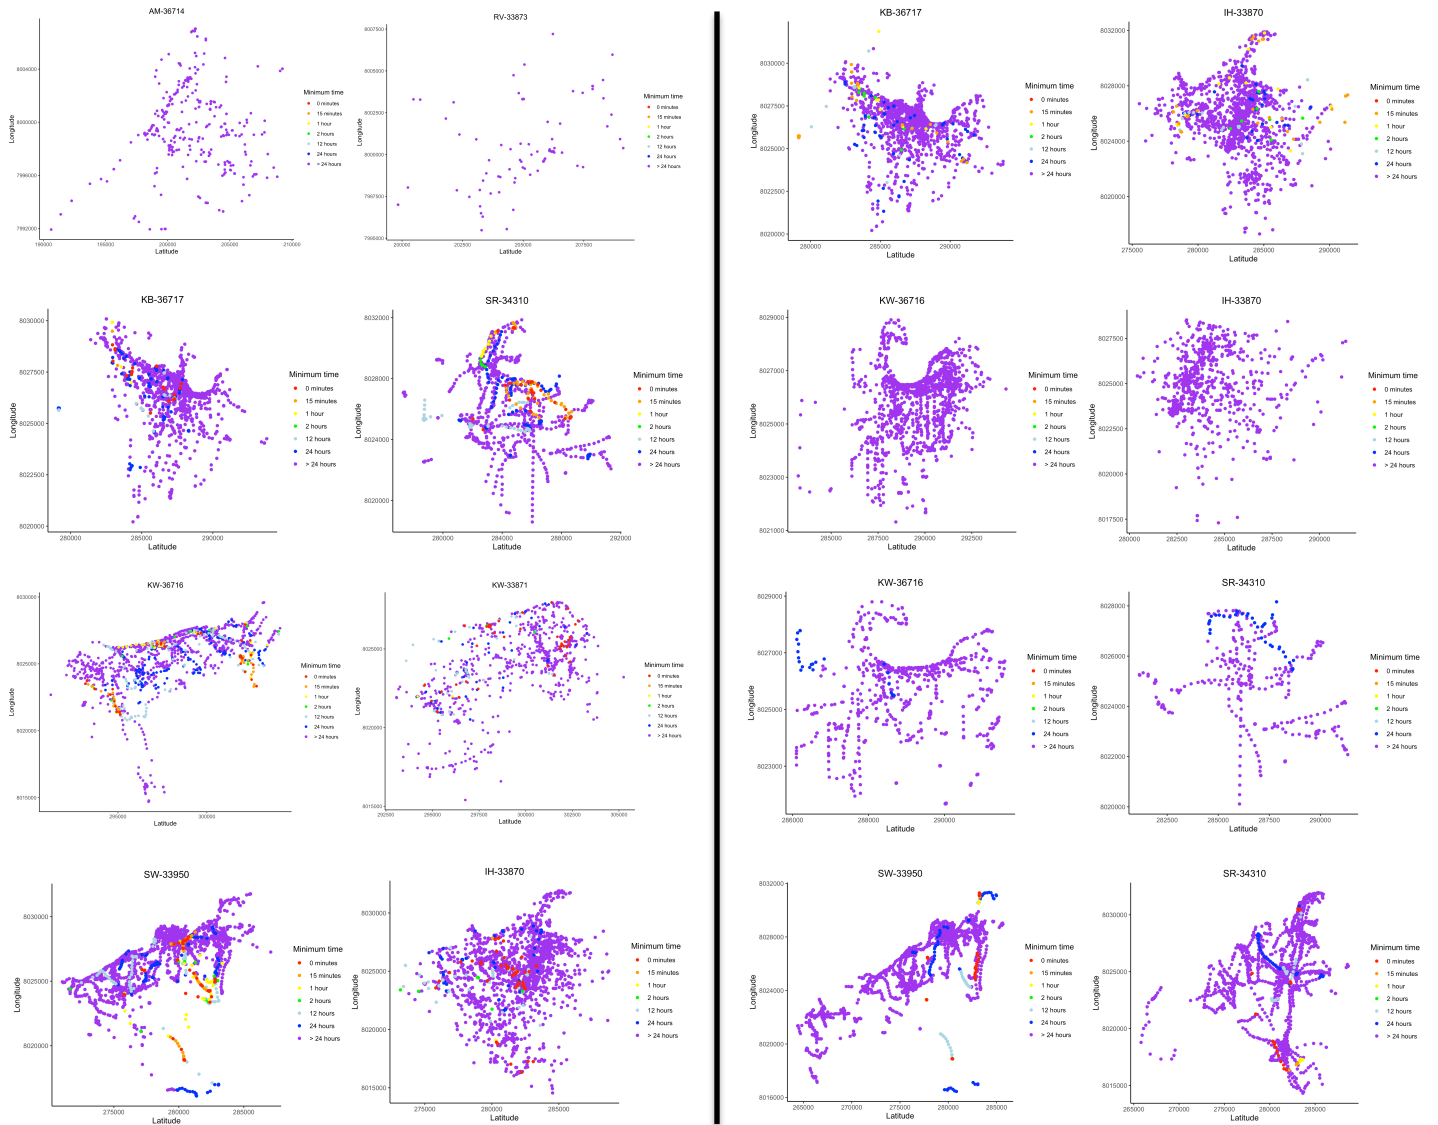

**Supplementary Appendix 3.** Minimum time lag in spatially overlapping hulls for individuals of a dyad. Each row represents two dyads, and the center line separates each dyad. Overlapping hulls of the lion from the dyad are represented by left panels and spotted hyenas are represented by right panels. Purple colours indicate time lag of >24 hours between overlapping hulls, and red colours indicate when the dyad occurred in the same area at the same time.
